# Supplementary material for: The diabetes medication Canagliflozin reduces cancer cell proliferation by inhibiting mitochondrial complex-I supported respiration
Source: PubMed Central journal article supplement — Mol Metab. 2016 Aug 26;5(10):1048–56. doi: 10.1016/j.molmet.2016.08.014 (PMC5034684; doi:10.1016/j.molmet.2016.08.014), 2016-08-26
Supplement: mmc1.pdf [file mmc1.pdf]

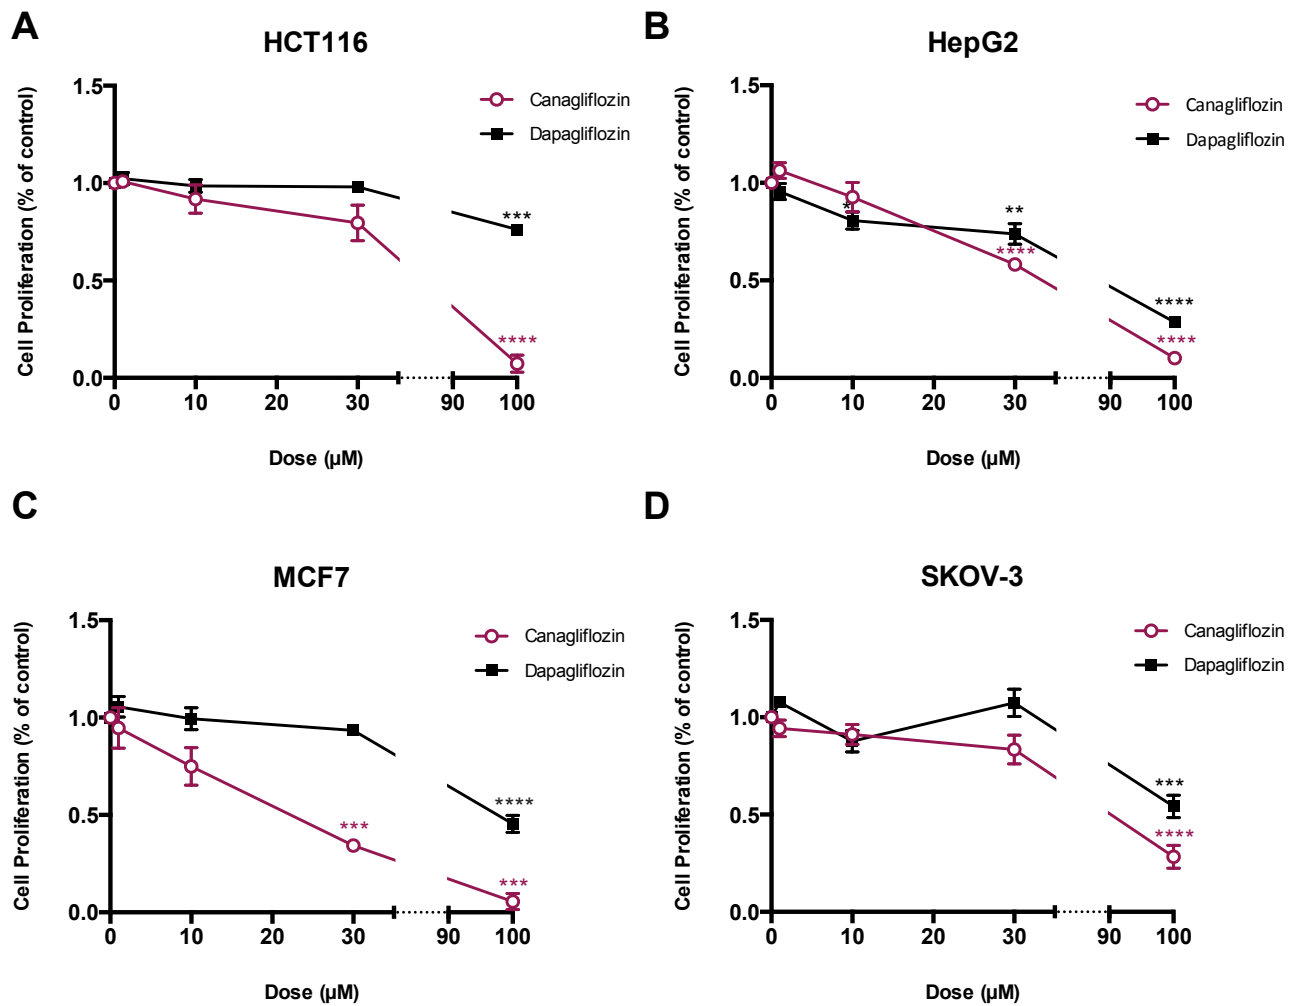

**Figure S1 – SGLT2 inhibitors block the proliferation of various cancer cells**

Cellular proliferation of (A) colon, (B) liver, (C) breast and (D) ovarian cancer cells treated with Canagliflozin or Dapagliflozin and expressed relative to the vehicle controls for 72h (n=3, in quadruplicate). Results are expressed as the mean and standard error of the mean (SEM). Vehicle versus treatment \*\* =  $p < 0.01$ , \*\*\* =  $p < 0.001$ , \*\*\*\* =  $p < 0.0001$  by one-way ANOVA for A-D.
