# Supplementary material for: The diabetes medication Canagliflozin reduces cancer cell proliferation by inhibiting mitochondrial complex-I supported respiration
Source: PubMed Central journal article supplement — Mol Metab. 2016 Aug 26;5(10):1048–56. doi: 10.1016/j.molmet.2016.08.014 (PMC5034684; doi:10.1016/j.molmet.2016.08.014), 2016-08-26
Supplement: mmc2.pdf [file mmc2.pdf]

**A**

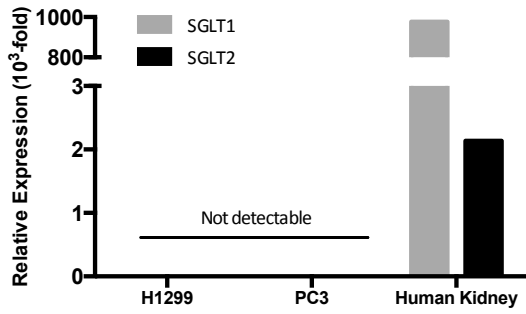

**B**

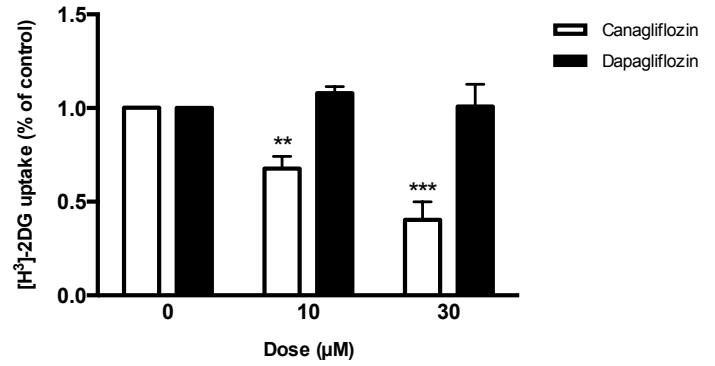

**C**

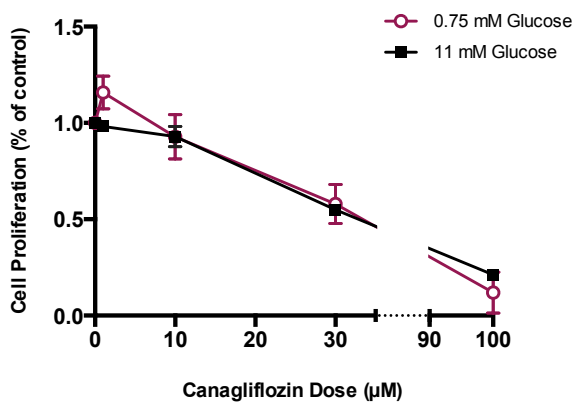

**D**

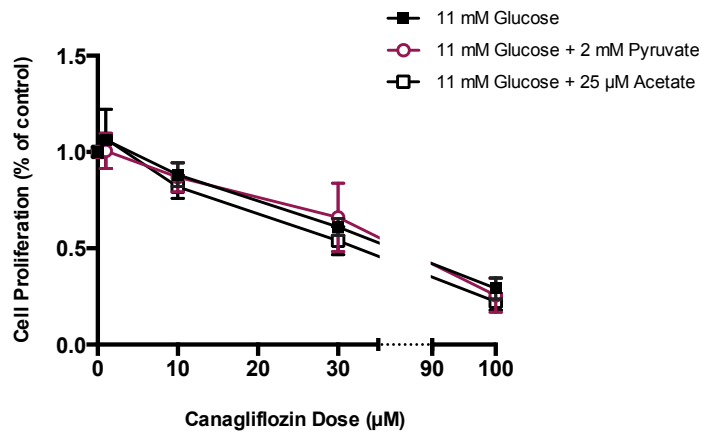

**F**

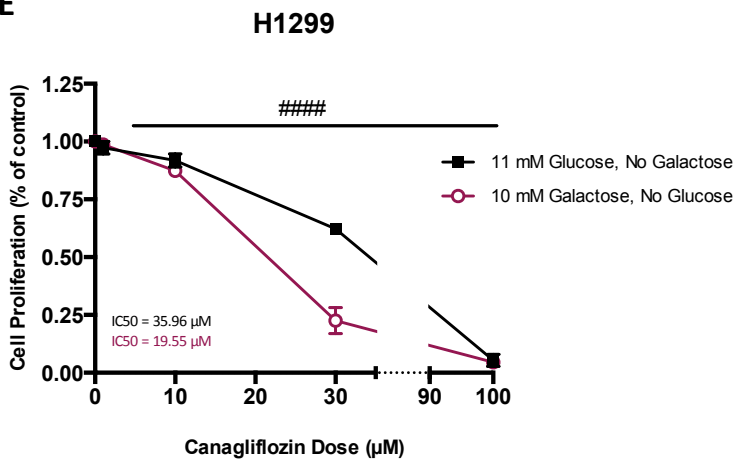

**Figure S2 – Canagliflozin inhibits 2-DG uptake independent of SGLTs in PC3 cells**

(A) mRNA expression of SGLT1 and SGLT2 in PC3 and H1299 cells corrected to housekeeper gene (18S) and compared to human kidney samples. (B)  $H^3$ -2DG uptake (pmol of  $H^3$ -2DG/mg of protein) in PC3 cells treated with Canagliflozin or Dapagliflozin for 10 minutes and expressed relative to the vehicle controls (n=3-4, in triplicate). (C) Cellular proliferation of PC3 cells maintained in 11 mM or 0.75 mM glucose and treated with Canagliflozin and expressed relative to the vehicle controls for 48h (n=3, in quadruplicate). (D) Cellular proliferation of PC3 cells maintained in 11 mM glucose and treated with Canagliflozin in pyruvate (2mM) or acetate (25 $\mu$ M) supplemented conditions and expressed relative to the vehicle control for 72h (n=3-4, in quadruplicate). (E) Cellular proliferation of H1299 cells maintained in 11 mM glucose or 10 mM galactose, treated with Canagliflozin and expressed relative to the vehicle controls for 72h (n=3, in quadruplicate). Results are expressed as the mean and standard error of the mean (SEM). Vehicle versus treatment \*\* =  $p < 0.01$ , \*\*\* =  $p < 0.001$  by one-way ANOVA for B. Galactose versus Glucose ##### =  $p < 0.0001$  by two-way ANOVA for E.
