# Supplementary material for: The diabetes medication Canagliflozin reduces cancer cell proliferation by inhibiting mitochondrial complex-I supported respiration
Source: PubMed Central journal article supplement — Mol Metab. 2016 Aug 26;5(10):1048–56. doi: 10.1016/j.molmet.2016.08.014 (PMC5034684; doi:10.1016/j.molmet.2016.08.014), 2016-08-26
Supplement: mmc3.pdf [file mmc3.pdf]

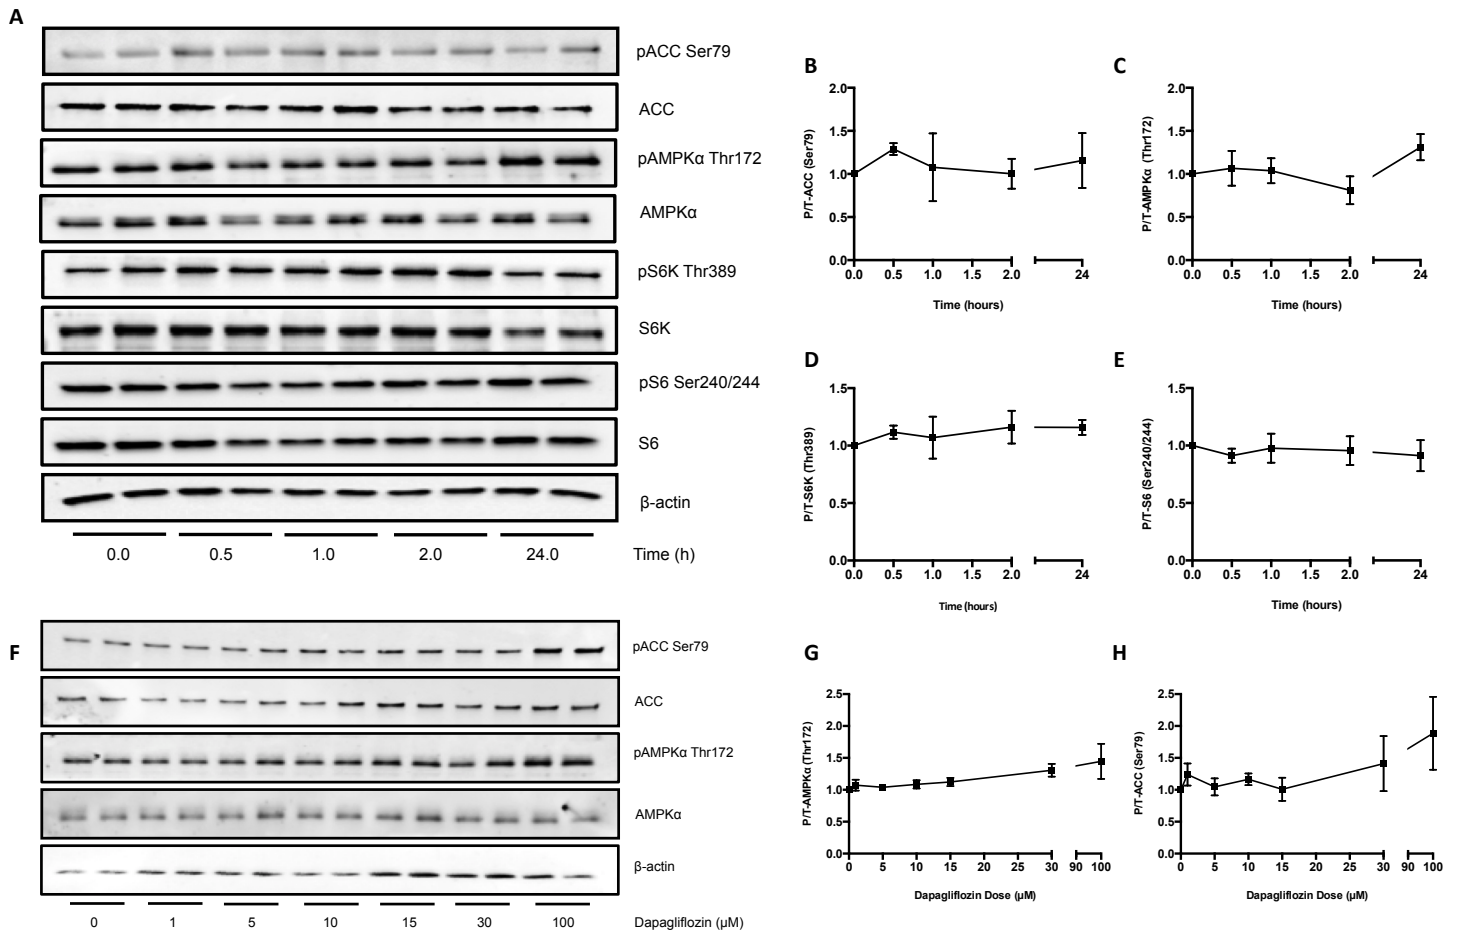

**Figure S3 – Dapagliflozin does not activate AMPK within the clinical window of exposure**

(A) Representative western blot of Dapagliflozin treated PC3 cells. Dapagliflozin (30 μM) does not alter the expression of pAMPK, pACC, pS6K or pS6 within 30 min. (B-E) Quantification of (A) (n=3, in duplicate). (F) Effects of Dapagliflozin on pAMPK and pACC in PC3 cells after 30 min. (G-H) Quantification of (F) (n=3, in duplicate). Results are expressed as the mean and standard error of the mean (SEM).
